# Supplementary material for: Integrative inference of gene-regulatory networks in Escherichia coli using information theoretic concepts and sequence analysis
Source: Springer Nature journal article supplement (doi:10.1186/1752-0509-4-116), 2010-08-18

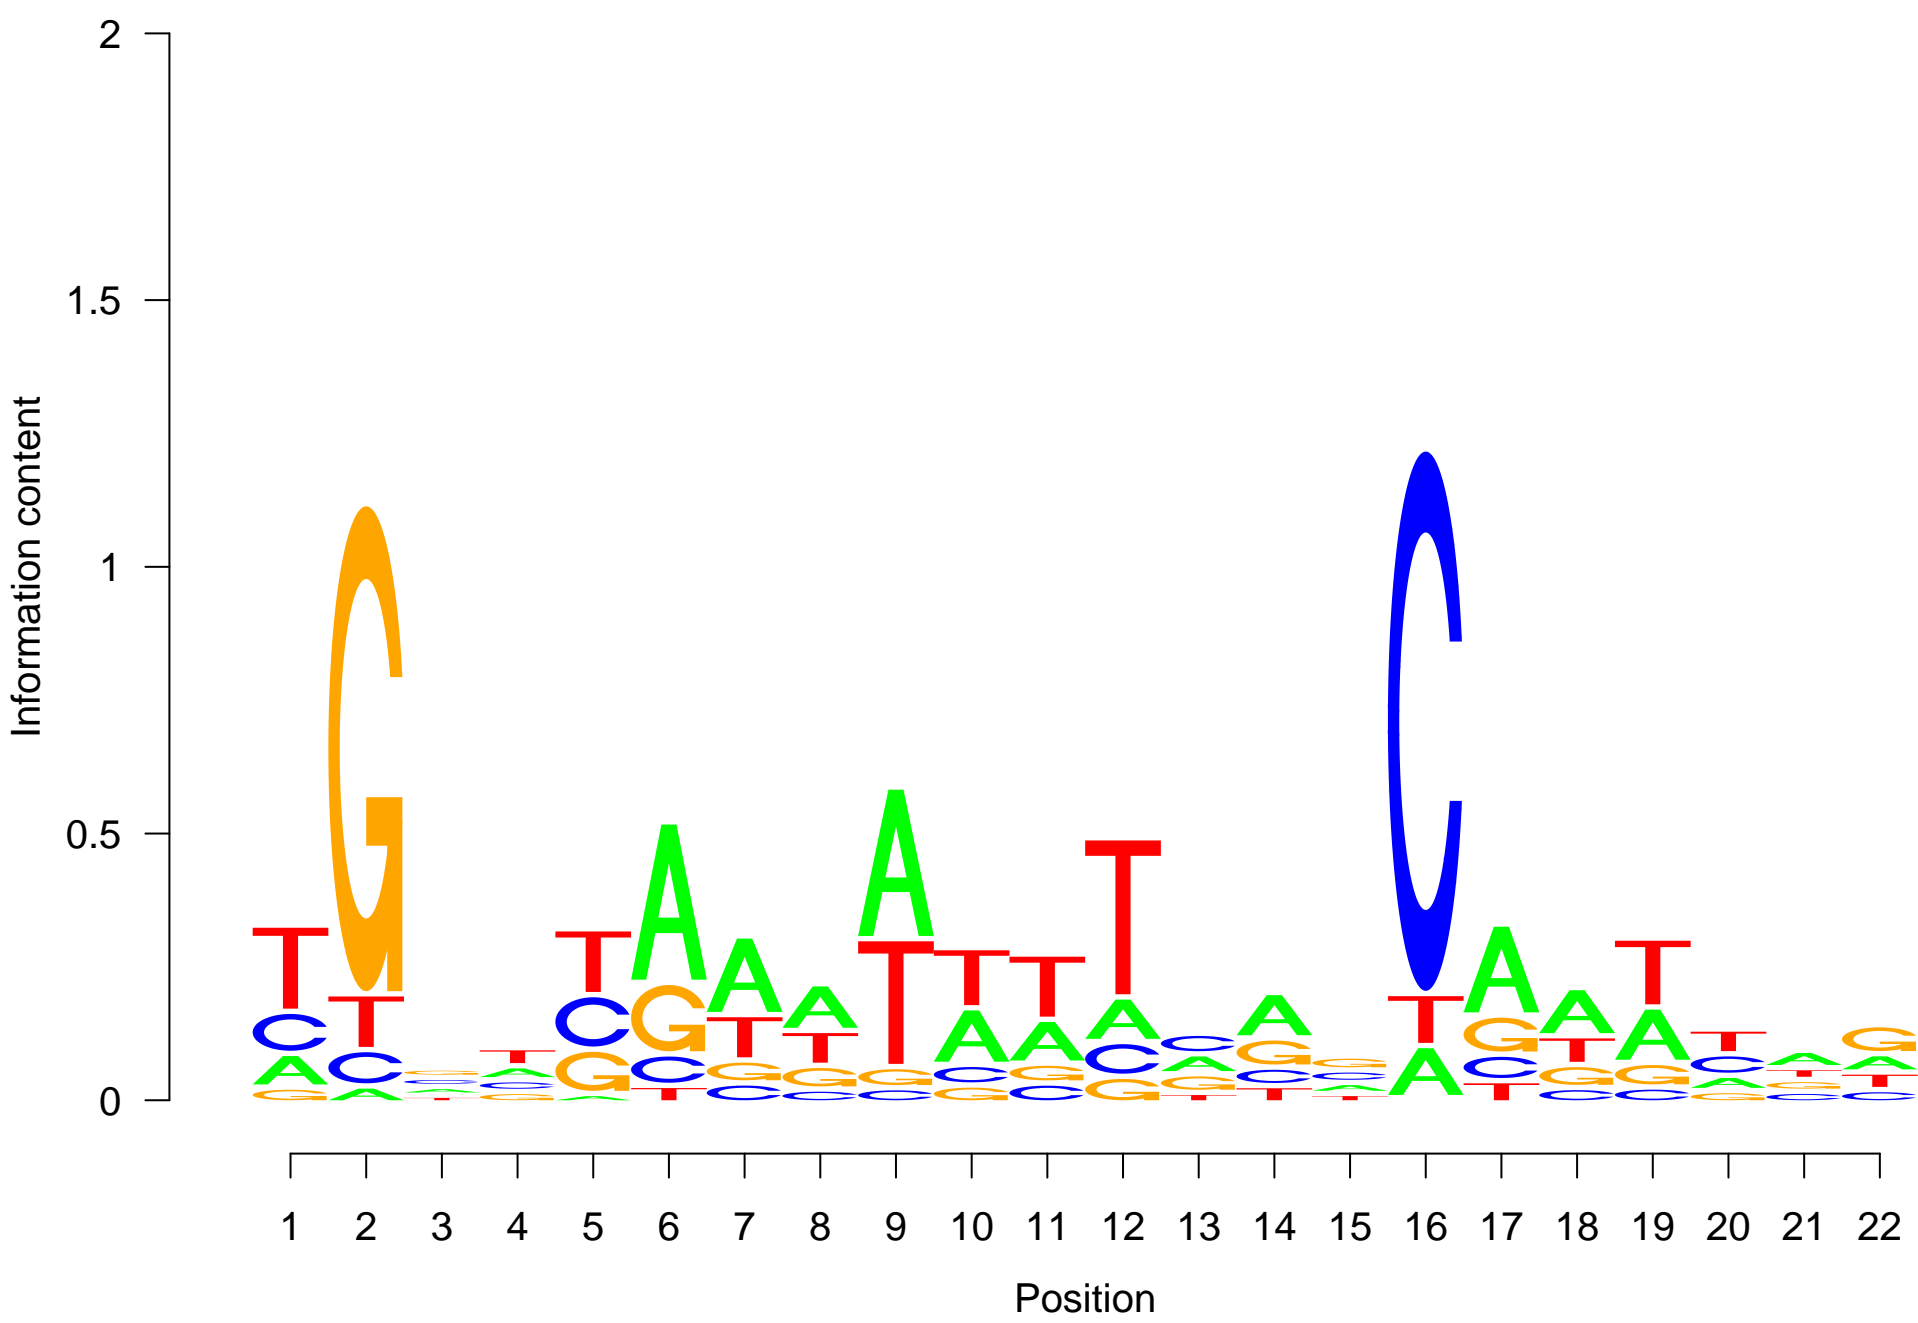

Supplement: 12918_2010_505_MOESM5_ESM.pdf [file 12918_2010_505_MOESM5_ESM.pdf]
