# Supplementary material for: Integrative inference of gene-regulatory networks in Escherichia coli using information theoretic concepts and sequence analysis
Source: Springer Nature journal article supplement (doi:10.1186/1752-0509-4-116), 2010-08-18

**A***pdhRop*

PdhR

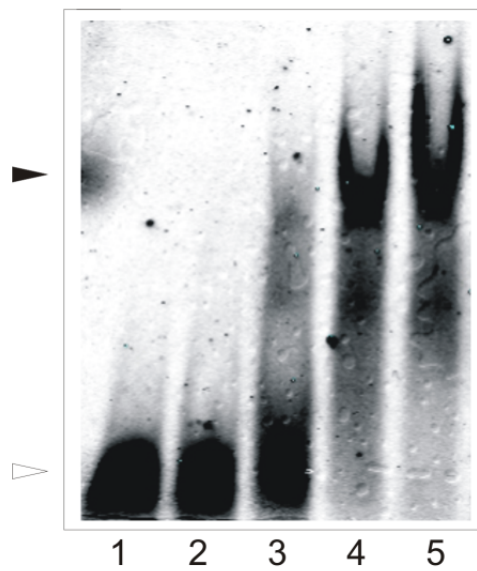**B***pdhRop*+ Pyruvate  
+ PdhR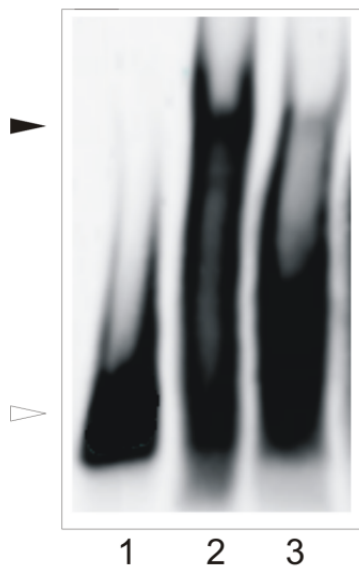**C***ptsGop*

PdhR

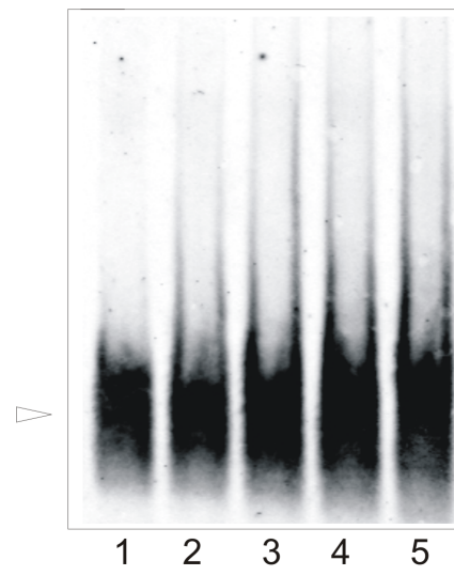**D***lipAop*

PdhR

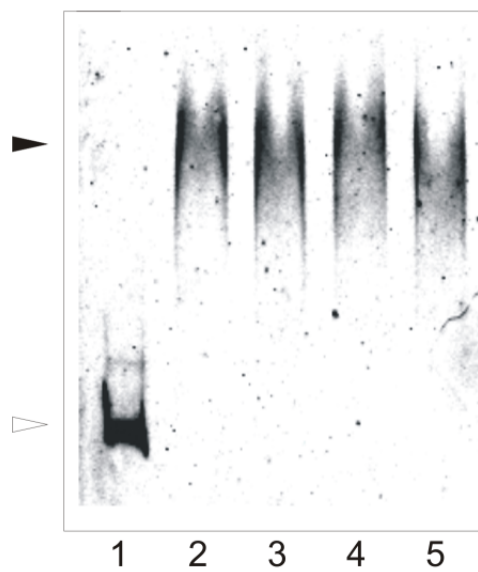**E***lipAop*+ Pyruvate  
+ PdhR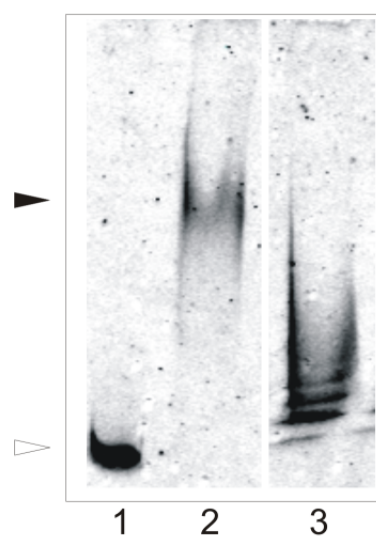

Supplement: 12918_2010_505_MOESM6_ESM.pdf [file 12918_2010_505_MOESM6_ESM.pdf]
