# Supplementary material for: Integrative inference of gene-regulatory networks in Escherichia coli using information theoretic concepts and sequence analysis
Source: Springer Nature journal article supplement (doi:10.1186/1752-0509-4-116), 2010-08-18
Supplement: 12918_2010_505_MOESM10_ESM.pdf [file 12918_2010_505_MOESM10_ESM.pdf]

total 203 experiments

38 time-series experiments

19 time-series experiments  
at 4 equidistant time points:  
0, 30, 60, 90 min
